# Supplementary material for: Comparative Investigation of Human Amniotic Epithelial Cells and Mesenchymal Stem Cells for Application in Bone Tissue Engineering
Source: Hindawi journal article supplement (doi:10.1155/2015/565732), 2015-01-01
Supplement: f1 [file 565732.f1.pdf]

## **Supplemental material I: microarray analysis method**

Total RNAs was quantified by the NanoDrop ND-2000 (Thermo Scientific) and the RNAs integrity was assessed using Agilent Bioanalyzer 2100 (Agilent Technologies). The sample labeling, microarray hybridization and washing were performed based on the manufacturer's standard protocols. Briefly, 1 mg of the total RNAs were transcribed to double strand cDNAs and then synthesized cRNAs. Next, 2nd cycle cDNAs were synthesized from cRNAs. Followed fragmentation and biotin labeling, the 2nd cycle cDNAs were hybridized onto the microarray. After washing and staining, the arrays were scanned by the Affymetrix Scanner 3000(Affymetrix).

Raw expression data were normalized and subsequently analyzed with GeneChip Command Console (version 4.0, Affymetrix) software and Expression Console (version1.3.1, Affymetrix) software. Comparative genes expression analyses were performed with the Genespring software (version 12.5; Agilent Technologies). Differentially expressed genes of hAECs, hBMSCs and hAFSCs before and after osteogenic induction were then identified through fold change. The threshold set for up- and down-regulated genes in per pair-wise comparison was a fold change $\geq$  1.5. Functional classification of the selected genes involved in osteogenesis and ossification was conducted using the Gene Ontology Annotation database. Both hierarchical cluster analysis and protein interaction network analysis were performed on the up-regulated genes of hAECs, hBMSCs and hAFSCs involved in osteogenesis and ossification using the MultiExperiment Viewer software (Version: v4.9; Dana-Farber Cancer Institute) and the search tool STRING (<http://string-db.org>). For protein interaction network analysis, a gene of interest was classified as a hub if it had more than 5 interactions with other genes. To increase the result validity, the analysis was restricted to include only experimentally determined protein interactions, database annotations and textmining.

**Supplemental material II: Primer sequences used for real-time PCR analysis**

| Gene    | Primer Sequence | Accession Number          |              |
|---------|-----------------|---------------------------|--------------|
| GAPDH   | Forward         | GCTCTCCAGAACATCATCC       | NM_002046.3  |
|         | Reverse         | TGC TTCACCACCTTCTTG       |              |
| COL I   | Forward         | CAGCCGCTTCACCTACAGC       | NM_000088.3  |
|         | Reverse         | TTTTGTATTCAATCACTGTCTTGCC |              |
| ALP     | Forward         | ACTCCCACTTCATCTGGAACC     | J04948.1     |
|         | Reverse         | CCTGTTTCAGCTCGTACTGCAT    |              |
| OPN     | Forward         | CAGAA TGCTGTGTCTCTGAA     | NM_001040058 |
|         | Reverse         | GTCAATGGAGTCCTGGCTGT      |              |
| Osterix | Forward         | TGAGGAGGAAGTTC ACTATGG    | BC101549.1   |
|         | Reverse         | TTCTTTGTGCCTGCTTTGC       |              |
| Runx2   | Forward         | GTCTCACTGCCTCTCACTTG      | BC108920.1   |
|         | Reverse         | CAC ACATCTCCTCCCTTCTG     |              |
| BMP2    | Forward         | GGGCATCCTCTCCACAAA        | NM_001200.2  |
|         | Reverse         | GTCATTCCACCCACGTC         |              |
| BMP4    | Forward         | CCACGAAGAACATCTGGAGAAC    | BC020546.2   |
|         | Reverse         | ATACGGTGGAAGCCCCTTT       |              |
| BMP6    | Forward         | TGCAGGAAGCATGAGCTG        | NM_001718.4  |
|         | Reverse         | GTGCGTTGAGTGGGAAGG        |              |
| FOXO1   | Forward         | CGCAGATCTACGAGTGGATGGT    | NM_002015.3  |
|         | Reverse         | GCTCGGCTTCGGCTCTTA        |              |
| FOXC1   | Forward         | CACACCAGCGAACAGAAT        | NM_001453.2  |
|         | Reverse         | GCAAGGAAGAAGGCAAGA        |              |
| FOXC2   | Forward         | GCCTAAGGACCTGGTGAAGC      | NM_005251.2  |
|         | Reverse         | TTGACGAAGCACTCGTTGAG      |              |
